# Supplementary material for: A multilevel pan-cancer map links gene mutations to cancer hallmarks
Source: PubMed Central journal article supplement (PMC4593384; doi:10.1186/s40880-015-0050-6), 2015-09-14

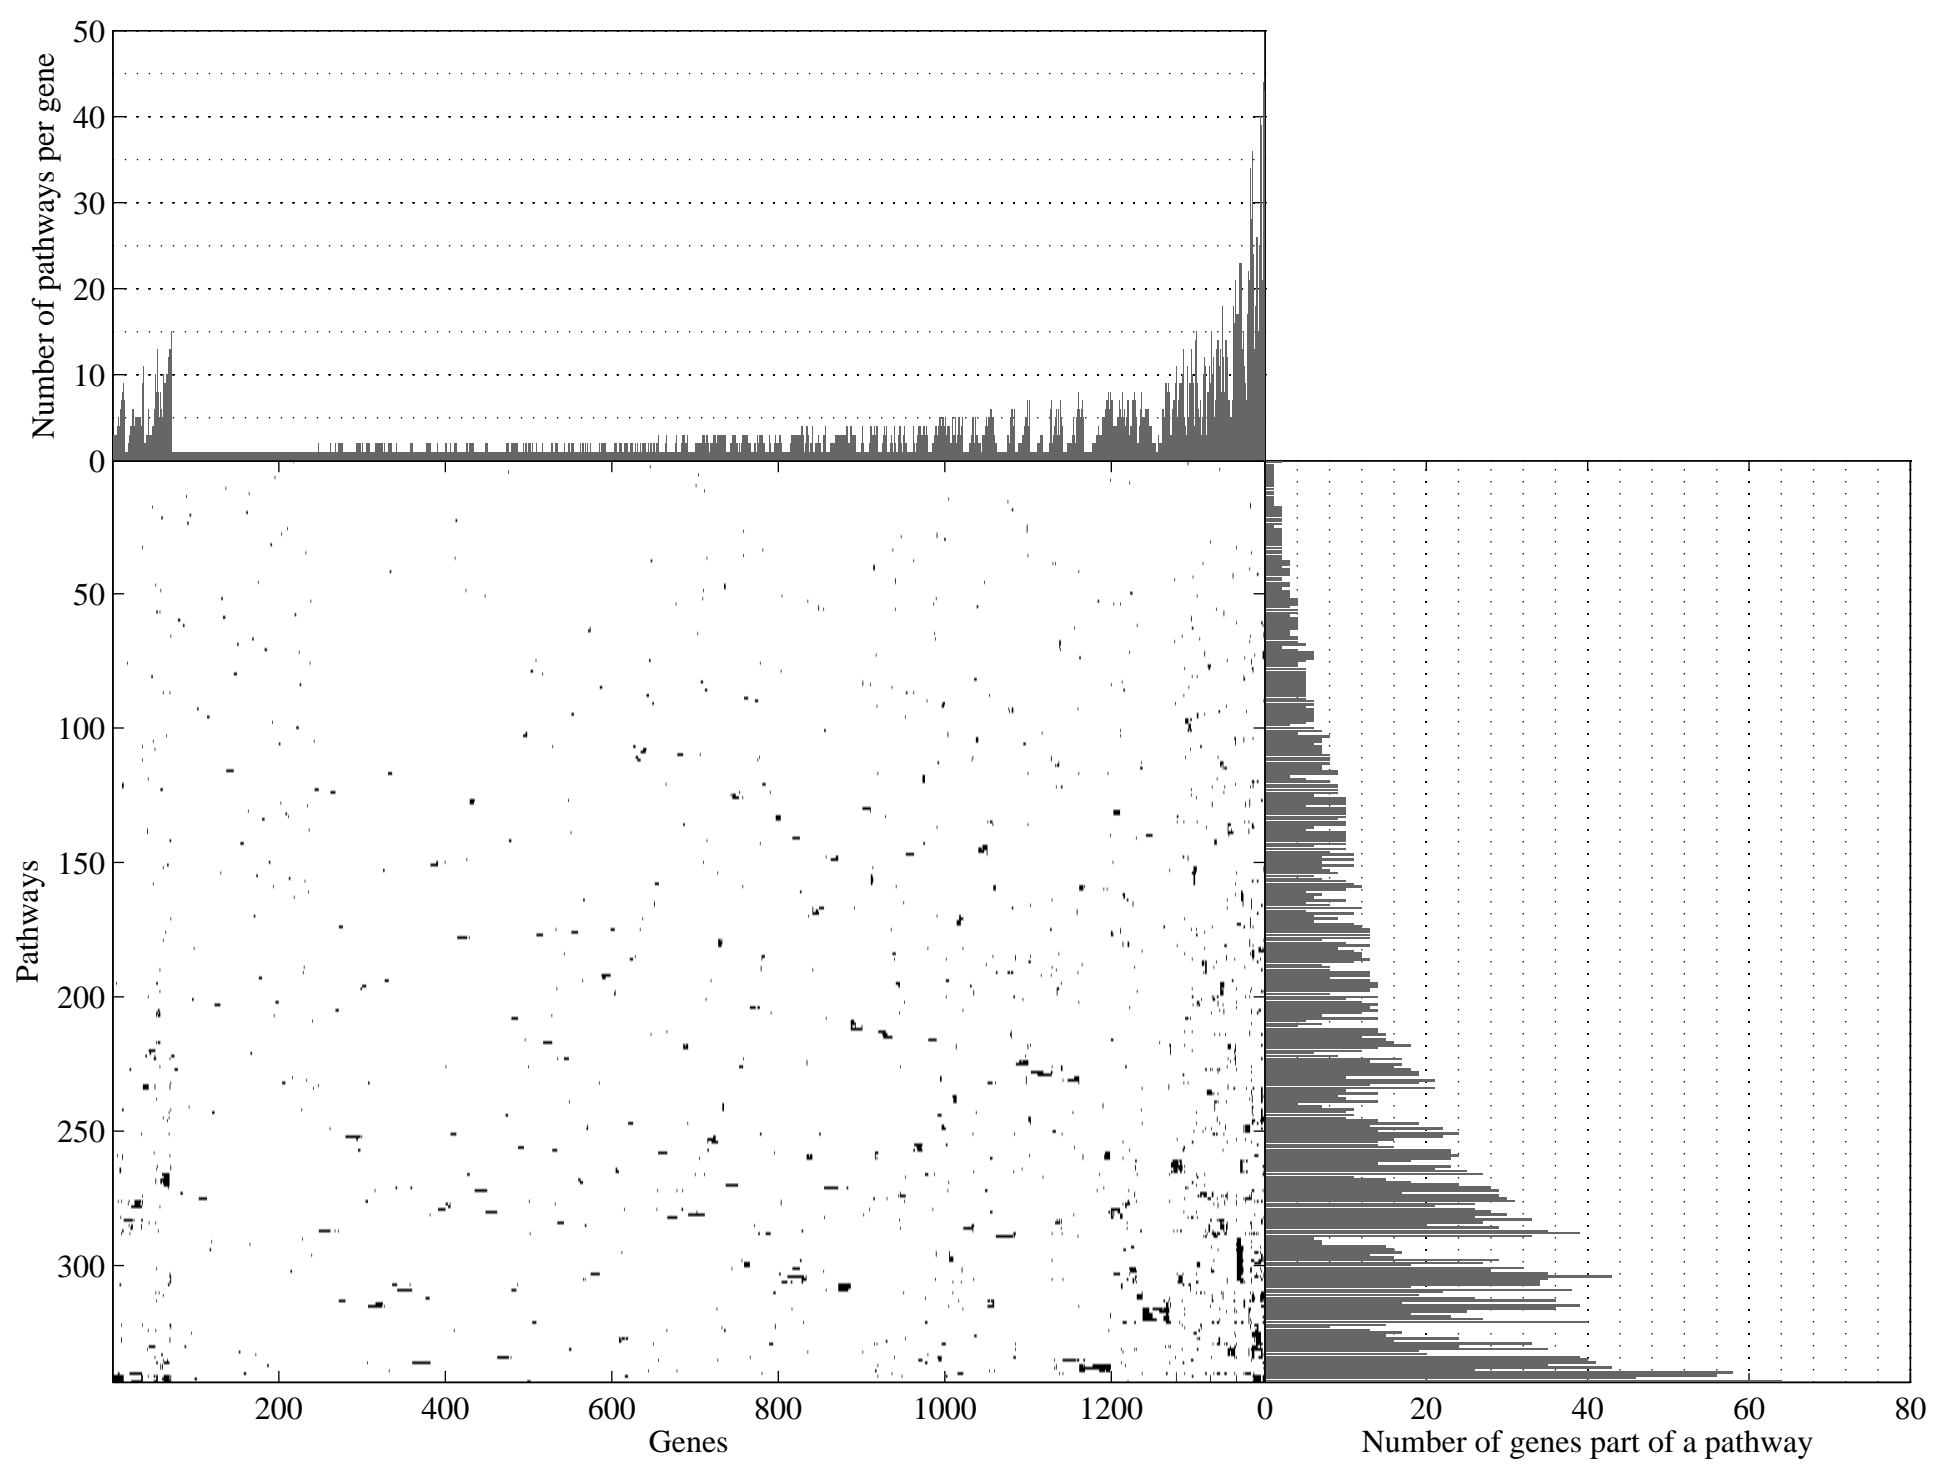

Supplement: 40880_2015_50_MOESM2_ESM.pdf [file 40880_2015_50_MOESM2_ESM.pdf]
